# Supplementary material
Source: PubMed Central journal article supplement (PMC9274864)
Supplement: sj-pdf-1-jcb-10.1177_0271678X211066299.pdf [file sj-pdf-1-jcb-10.1177_0271678X211066299.pdf]

## Supplementary Tables and Figures

National Alzheimer's Coordinating Center (NACC) participants were excluded if they had any of the following conditions noted in the NACC Neuropathology Data Set. Variable names and descriptions are taken from <https://files.alz.washington.edu/documentation/rdd-np.pdf>. Variable descriptions may be lightly edited. Participants were not excluding for missing data in any of these fields.

Table S1: NACC Exclusion Criteria

| NACC variable | Description                                                             |
|---------------|-------------------------------------------------------------------------|
| NACCDOWN      | Down syndrom                                                            |
| NPPDXB        | Multiple system atrophy                                                 |
| NPPDXE        | Malformation of cortical development                                    |
| NPPDXD        | Trinucleotide disease (Huntington disease, SCA, other)                  |
| NPPDXF        | Metabolic/storage disorder of any type                                  |
| NPPDXG        | White matter disease, leukodystrophy                                    |
| NPPDXH        | White matter disease, multiple sclerosis or other demyelinating disease |
| NPPDXI        | Contusion/traumatic brain injury of any type, acute                     |
| NPPDXJ        | Contusion/traumatic brain injury of any type, chronic                   |
| NPPDXK        | Neoplasm, primary                                                       |
| NPPDXL        | Neoplasm, metastatic                                                    |
| NPPDXM        | Infectious process of any type (encephalitis, abscess, etc.)            |
| NPPDXN        | Herniation, any site                                                    |
| NACCPRIO      | Prion disease                                                           |
| NPPATH10      | CADASIL (hereditary stroke disorder)                                    |
| NPALSMND      | ALS/motor neuron disease (MND)                                          |
| NPFTDTAU      | FTLD with tau pathology (FTLD-tau) or other tauopathy                   |
| NPFTDTDP      | FTLD with TDP- 43 pathology (FTLD-TDP)                                  |
| NPOFTD        | Other FTLD                                                              |

Table S1: NACC Exclusion Criteria

| NACC variable | Description                        |
|---------------|------------------------------------|
| NPPDXA        | Pigment-spheroid degeneration/NBIA |

Supplementary Table S2: Stage 1 Ordinal Regression Results

| SNP        | CHR | BP          | Gene            | A1/A2 | NACC OR<br>[95% CI] | NACC P  | ROSMAP OR<br>[95% CI] | ROSMAP<br>P |
|------------|-----|-------------|-----------------|-------|---------------------|---------|-----------------------|-------------|
| rs11691214 | 2   | 59,435,619  | <i>FANCL</i>    | A/T   | 1.27 [1.14-1.4]     | 9.6e-06 | 0.95 [0.8-1.13]       | 0.61        |
| rs34349961 | 2   | 65,535,731  | <i>SPRED2</i>   | G/A   | 1.32 [1.17-1.48]    | 3.1e-06 | 1.16 [0.96-1.4]       | 0.13        |
| rs56366943 | 2   | 126,891,098 | <i>GYPC</i>     | G/A   | 1.35 [1.18-1.54]    | 6.9e-06 | 1.01 [0.81-1.26]      | 0.94        |
| rs10049413 | 3   | 49,892,896  | <i>TRAIP</i>    | A/G   | 1.25 [1.13-1.38]    | 7.6e-06 | 0.97 [0.83-1.14]      | 0.75        |
| rs76172105 | 4   | 21,674,745  | <i>KCNIP4</i>   | A/G   | 1.43 [1.23-1.66]    | 4.6e-06 | 1.03 [0.81-1.31]      | 0.8         |
| rs3774902  | 4   | 23,890,782  | <i>PPARGC1A</i> | A/G   | 1.6 [1.32-1.95]     | 2.1e-06 | -                     | -           |
| rs4596251  | 4   | 124,472,197 | <i>SPRY1</i>    | A/G   | 1.32 [1.17-1.49]    | 5.9e-06 | 0.94 [0.77-1.14]      | 0.54        |
| rs9392767  | 6   | 6,342,851   | <i>F13A1</i>    | C/T   | 1.23 [1.12-1.35]    | 8.4e-06 | 1.17 [1-1.37]         | 0.042       |
| rs2603462  | 6   | 81,418,667  | <i>BCKDHB</i>   | C/A   | 1.32 [1.18-1.48]    | 2.5e-06 | 1.05 [0.86-1.28]      | 0.63        |

Supplementary Table S2: Stage 1 Ordinal Regression Results

| SNP         | CHR | BP         | Gene           | A1/A2 | NACC OR<br>[95% CI] | NACC P  | ROSMAP OR<br>[95% CI] | ROSMAP<br>P |
|-------------|-----|------------|----------------|-------|---------------------|---------|-----------------------|-------------|
| rs6574718   | 14  | 26,395,832 | <i>NOVA1</i>   | C/T   | 1.25 [1.14-1.37]    | 4.1e-06 | -                     | -           |
| rs11644522  | 16  | 6,686,023  | <i>RBFOX1</i>  | G/A   | 1.25 [1.14-1.37]    | 2.4e-06 | 1 [0.86-1.16]         | 0.99        |
| rs112700375 | 18  | 33,834,804 | <i>MOCOS</i>   | T/G   | 1.54 [1.28-1.85]    | 4.1e-06 | 0.68 [0.51-0.92]      | 0.014       |
| rs387083    | 19  | 35,847,115 | <i>FFAR3</i>   | G/A   | 1.23 [1.13-1.35]    | 3.9e-06 | 0.98 [0.84-1.14]      | 0.85        |
| rs116881820 | 19  | 45,397,952 | <i>TOMM40</i>  | C/T   | 1.6 [1.3-1.96]      | 5.9e-06 | -                     | -           |
| rs6081741   | 20  | 19,744,341 | <i>SLC24A3</i> | G/A   | 1.26 [1.14-1.39]    | 2.7e-06 | 1.06 [0.89-1.26]      | 0.49        |
| rs11204484  | 22  | 49,218,823 | <i>FAM19A5</i> | G/T   | 1.24 [1.13-1.36]    | 2.1e-06 | -                     | -           |

Key: SNP, single nucleotide polymorphism; CHR, Chromosome; BP, base pair; Gene, closest protein-coding gene; A1/A2, effect/non-effect allele; OR, odds ratio; 95% CI, 95% confidence interval. A1 set so that NACC OR  $\geq$  1.

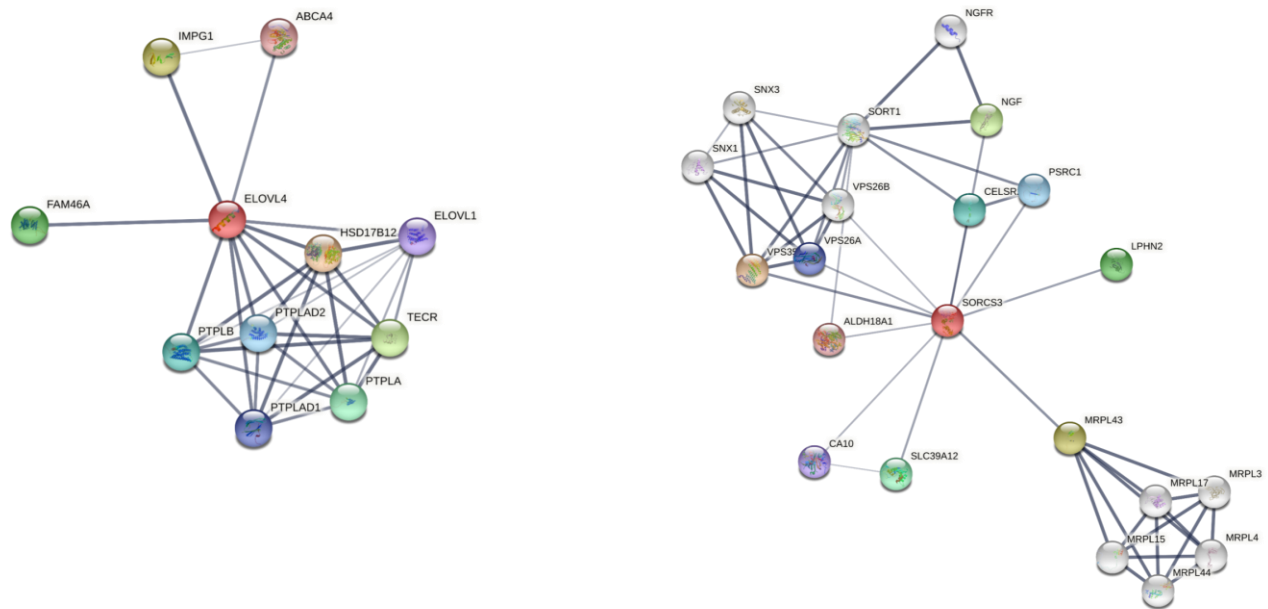

**Figure S1: *ELOVL4* and *SORCS3* Gene Networks.** Left: *ELOVL4* gene network. Right: *SORCS3* gene network. Confidence of association denoted by line thickness. Generated using STRING (<https://string-db.org/>).

Supplementary Table S3: Stage 3 Gene-Based Analysis Results

| Gene | CHR | Start-Stop | P |
|------|-----|------------|---|
|------|-----|------------|---|

Supplementary Table S3: Stage 3 Gene-Based Analysis Results

| Gene         | CHR | Start-Stop                   | P       |
|--------------|-----|------------------------------|---------|
| SORCS1       | 10  | 107,333,421 -<br>109,924,466 | 5.5e-05 |
| ADAM28       | 8   | 23,151,553 -<br>25,212,726   | 6.0e-04 |
| <i>OR1K1</i> | 9   | 124,562,402 -<br>126,563,352 | 6.2e-04 |
| <i>OR5C1</i> | 9   | 124,551,212 -<br>126,552,174 | 6.4e-04 |
| <i>OR1L6</i> | 9   | 124,512,127 -<br>126,513,062 | 6.4e-04 |
| <i>OR1L4</i> | 9   | 124,486,269 -<br>126,487,204 | 6.5e-04 |
| <i>PDCL</i>  | 9   | 124,580,376 -<br>126,590,935 | 8.9e-04 |
| <i>OR1L3</i> | 9   | 124,437,409 -<br>126,438,383 | 1.0e-03 |

Key: CHR, Chromosome; Start-Stop, start and end positions of region mapped to gene.

All genes with  $p < 0.0001$  included.
